# Supplementary material
Source: PubMed Central journal article supplement (PMC6628837)
Supplement: pnas.1900787116.sapp.pdf [file pnas.1900787116.sapp.pdf]

1

## 2 **Supplementary Information for**

### 3 **Cochlear partition anatomy and motion in humans differ from the classic view of mammals**

4 **Stefan Raufer, John J. Guinan Jr., and Hideko Heidi Nakajima**

5 **Stefan Raufer**

6 **E-mail: [sraufer2@gmail.com](mailto:sraufer2@gmail.com)**

#### 7 **This PDF file includes:**

8     Supplementary text

9     Figs. S1 to S4

10    References for SI reference citations

## 11 Supporting Information Text

### 12 Cochlear partition anatomy of humans and various laboratory-animal species

13 To provide perspective on the anatomy of humans versus laboratory animals, we present the cochlear anatomy of five species  
14 and of humans. The anatomy and motion in the base of these laboratory animals served as the main source for the generalized  
15 classic view of mammalian cochlear mechanics. The cross-sectional anatomy is shown for the basal part of the cochlea in Fig.  
16 S1 and for the apical part in Fig. S2. In each of the five laboratory species, cochleas of at least three different animals were  
17 studied, and because the images within a species were all similar, a representative image of each species and location is shown.

18 There are two major differences between the basal cochlear partition (CP) anatomy of humans and the classic view from  
19 laboratory animals: the presence of soft tissue between the osseous spiral lamina (OSL) and basilar membrane (BM) (i.e. a  
20 “bridge” region), and the positioning of the TM-limbus attachment above soft tissue as opposed to above OSL bone. Although  
21 we have found a bridge-like region in the apex of some animals (see Fig. S2), an unresolved question is how similar these regions  
22 are to the human bridge, i.e. do these regions have the same anatomical characteristics as the bridge in humans, such as radial  
23 collagen fibers (1). The second difference, the position of the TM-limbus attachment, is important because this position has  
24 implications for whether the medial end of the TM moves, or whether it is stationary as is assumed in classic cochlear models.  
25 If the TM-limbus attachment is over a bridge-like region with no bone, then it is much more likely that the TM attachment  
26 point moves in response to sound than if the TM-limbus attachment is over the bony OSL. The images in Figs. S1 and S2 shed  
27 light on these questions, but much more detailed anatomical and physiological work is needed to fully answer them.

28 The images in Figs. S1 and S2 are of histologically prepared sections stained with Hematoxylin and Eosin from the  
29 Otopathology Laboratory at our institution. To estimate the locations along the cochlea, we measured the BM widths from the  
30 sections shown in the figures, and translated BM width to cochlear location using published data: for human (2), guinea pig  
31 (3), mouse (4), gerbil (5), cat (6), and chinchilla (7). Greenwood maps of these species were used to translate cochlear location  
32 to best-frequency (BF) (8).

33 The basal-turn locations in Fig. S1 are approximately one-quarter to one-half cochlear turn from the basal end of the  
34 cochlea (distance from base labeled above each panel). Some general observations from Fig. S1 are: (i) the OSL bone comes  
35 close to or overlaps with the inner pillar of the organ of Corti (OoC) in all species but human (the lateral extent of OSL  
36 indicated by upward pointing arrows); (ii) the TM-limbus attachment (downward pointing arrows) is above the bridge in  
37 humans but above the bone of the OSL in all other species.

38 The cochlear anatomies of the apical-turn are shown in Fig. S2. They are 80–90% of the total cochlea length from the base.  
39 Some observations from Fig. S2 are: (i) the apical OSL appears shorter compared to the basal OSL in Figure S1 (varying  
40 across species); (ii) the lateral edge of the OSL bone (upward pointing arrows) overlaps with the inner pillar of the OoC  
41 only in gerbil. In the other species, a soft-tissue region, similar to a bridge, exists between the OSL and BM (the guinea pig  
42 shows virtually no OSL bone in the apex, which was also noted by Fernandez (3)); (iii) the TM-limbus attachment (downward  
43 pointing arrows) is over the bridge in humans and guinea pigs, but over the OSL bone in other species.

44 The observation of a CP bridge-like region in the apex of guinea pigs led us to reexamine motion measurements in the guinea  
45 pig apex to look for possible motion consequences of the soft-tissue region. Warren et al. (9) presented motion measurements  
46 said to be from across the width of the BM in the guinea pig apex. In their figure 3E, they show “BM” motion measurements  
47 over a radial distance of  $\sim 300 \mu\text{m}$  (if the exponential fit to their data is extrapolated, “BM” motion would be over a  $\sim 400 \mu\text{m}$   
48 range). However, the guinea pig BM shown in their figure 4B has a width of only  $\sim 200 \mu\text{m}$ . One explanation of these results is  
49 that Warren et al. measured motion over both the BM and a mobile CP bridge, but they attributed all of the measurements to  
50 the BM because they thought that only the BM had significant transverse motion. If so, the data of Warren et al. would be  
51 evidence for motion in a CP bridge region in a live animal. These measurements of cochlear motion, and many others, have not  
52 coordinated the motion measurements with the corresponding anatomy.

### Basal-turn anatomy

**Human** BM = 180  $\mu\text{m}$ , BF = 9 kHz, 6 mm (17%) from base

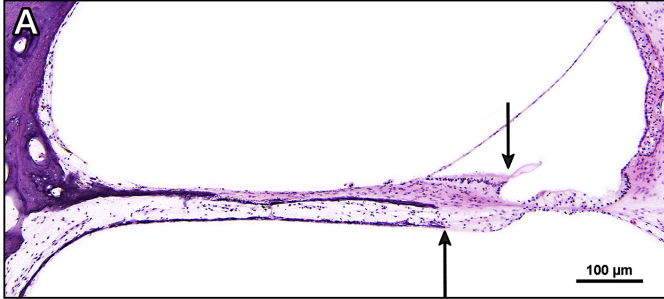

**Guinea Pig** BM = 190  $\mu\text{m}$ , BF = 10 kHz, 5.5 mm (30%) from base

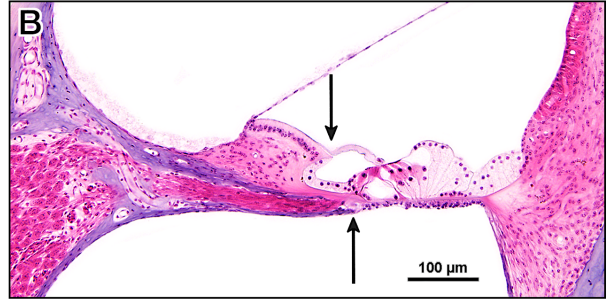

**Mouse** BM = 130  $\mu\text{m}$ , BF = 17.4 kHz, 2.7 mm (40%) from base

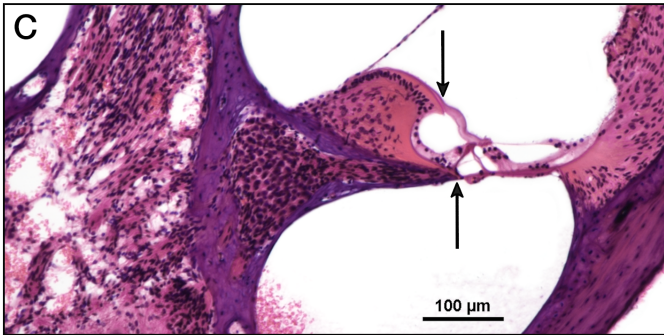

**Gerbil** BM = 208  $\mu\text{m}$ , BF = 14 kHz, 3 mm (25%) from base

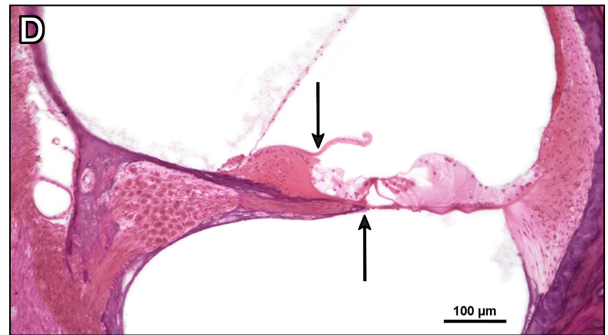

**Cat** BM = 187  $\mu\text{m}$ , BF = 16 kHz, 6.25 mm (25%) from base

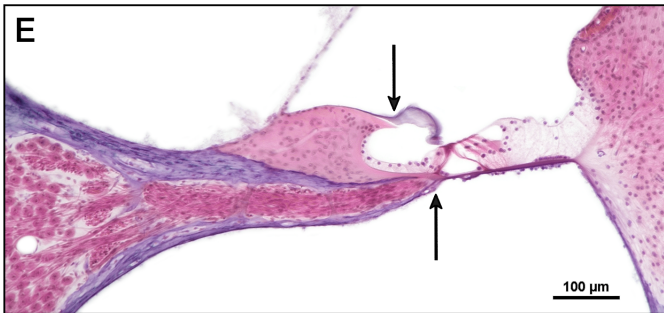

**Chinchilla** BM = 230  $\mu\text{m}$ , BF = 10 kHz, 2.8 mm (15%) from base

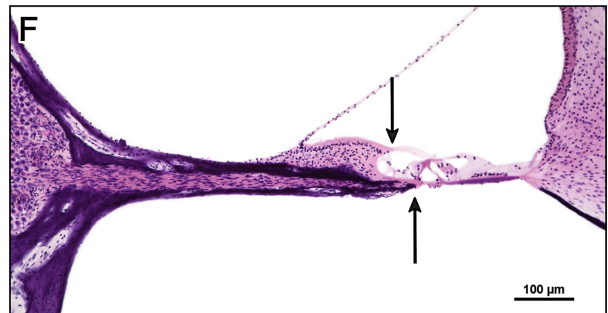

**Fig. S1.** Basal-turn cross-sectional cochlear anatomy of six species used in cochlear mechanical measurements: (A) Human, (B) guinea pig, (C) mouse, (D) gerbil, (E) cat, and (F) chinchilla. These sections are near the regions where many CP motion measurements have been made. In each, an up-arrow points up to the most lateral extent of bone of the osseous spiral lamina (OSL), and a down-arrow points to the attachment of tectorial membrane (TM) to the limbus. In all species but human, the bone of the OSL extends near to, or underneath, the inner pillar cells of the organ of Corti. In all species but human, the TM-limbus attachment point sits on top of OSL bone (compare the medial/lateral locations of the down-arrows with the up-arrows). Above each panel: the width of the basilar membrane (BM), the best frequency (BF) of the section, and the distance of the section from the basal end of the cochlea.

### Apical-turn anatomy

**Human** BM = 313  $\mu$ m, BF = 100 Hz, 31.6 mm (90%) from base

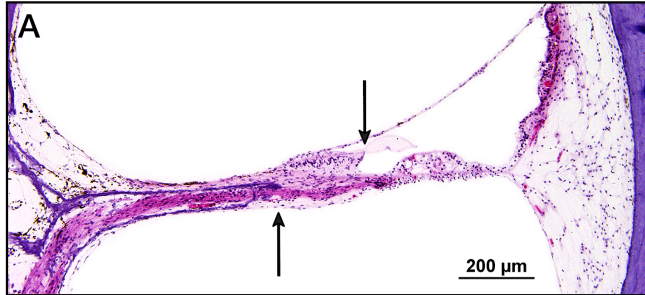

**Guinea Pig** BM = 238  $\mu$ m, BF = 500 Hz, 15 mm (81%) from base

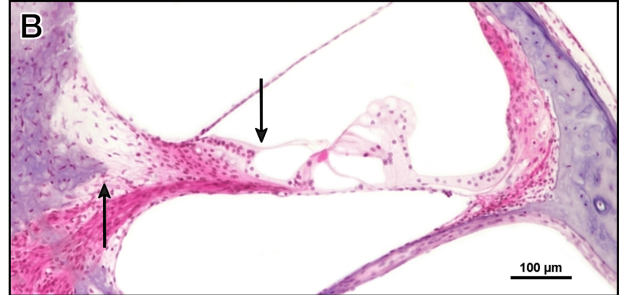

**Mouse** BM = 152  $\mu$ m, BF = 2.35 kHz, 5.6 mm (82%) from base

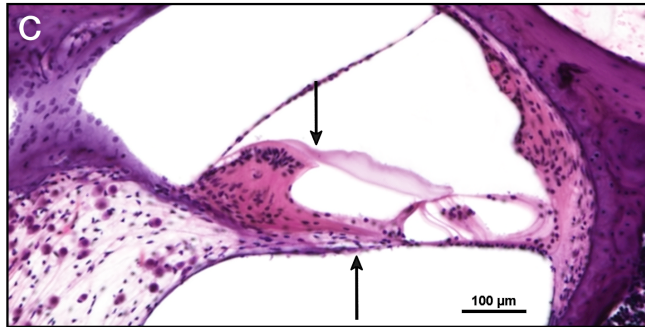

**Gerbil** BM = 303  $\mu$ m, BF = 700 Hz, 9.7 mm (80%) from base

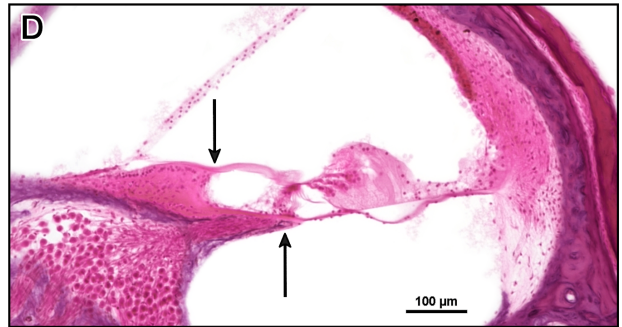

**Cat** BM = 340  $\mu$ m, BF = 600 Hz, 21.3 mm (85%) from base

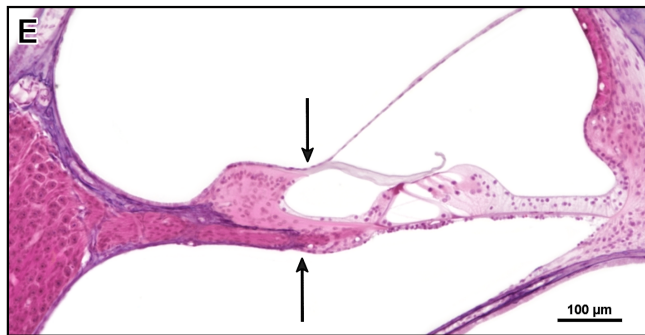

**Chinchilla** BM = 355  $\mu$ m, BF = 200 Hz, 15.6 mm (85%) from base

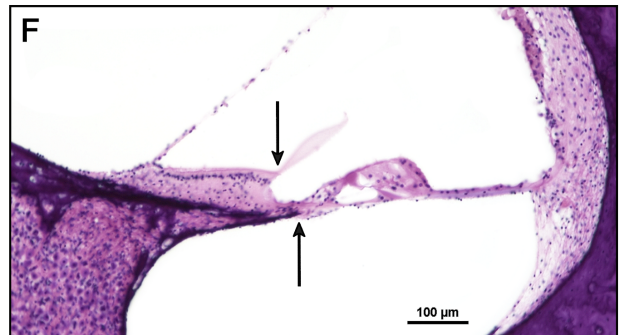

**Fig. S2.** Apical-turn cross-sectional cochlear anatomy of the six species of Fig. S1. The lateral edge of the OSL bone (upward pointing arrow) extends to underneath the inner pillar cells only in gerbil. A soft-tissue bridge between the OSL and BM is seen in all species except gerbil. Across species, these soft-tissue regions vary in width with respect to the BM. In chinchilla, the soft-tissue region is short, while in the guinea pig there is virtually no bony OSL in the apical turn. The spiral limbus (including the limbal attachment of the tectorial membrane (TM)) sits on the soft-tissue CP bridge in human and guinea pig, and on the bony OSL in the other species. Above each panel: the width of the basilar membrane (BM), the best frequency (BF) of the section, and the distance of the section from the basal end of the cochlea.



53 **Cochlear partition motion from six human temporal bones**

54 Figure S3 presents radial velocity profiles and tuning curves for all six specimens tested.

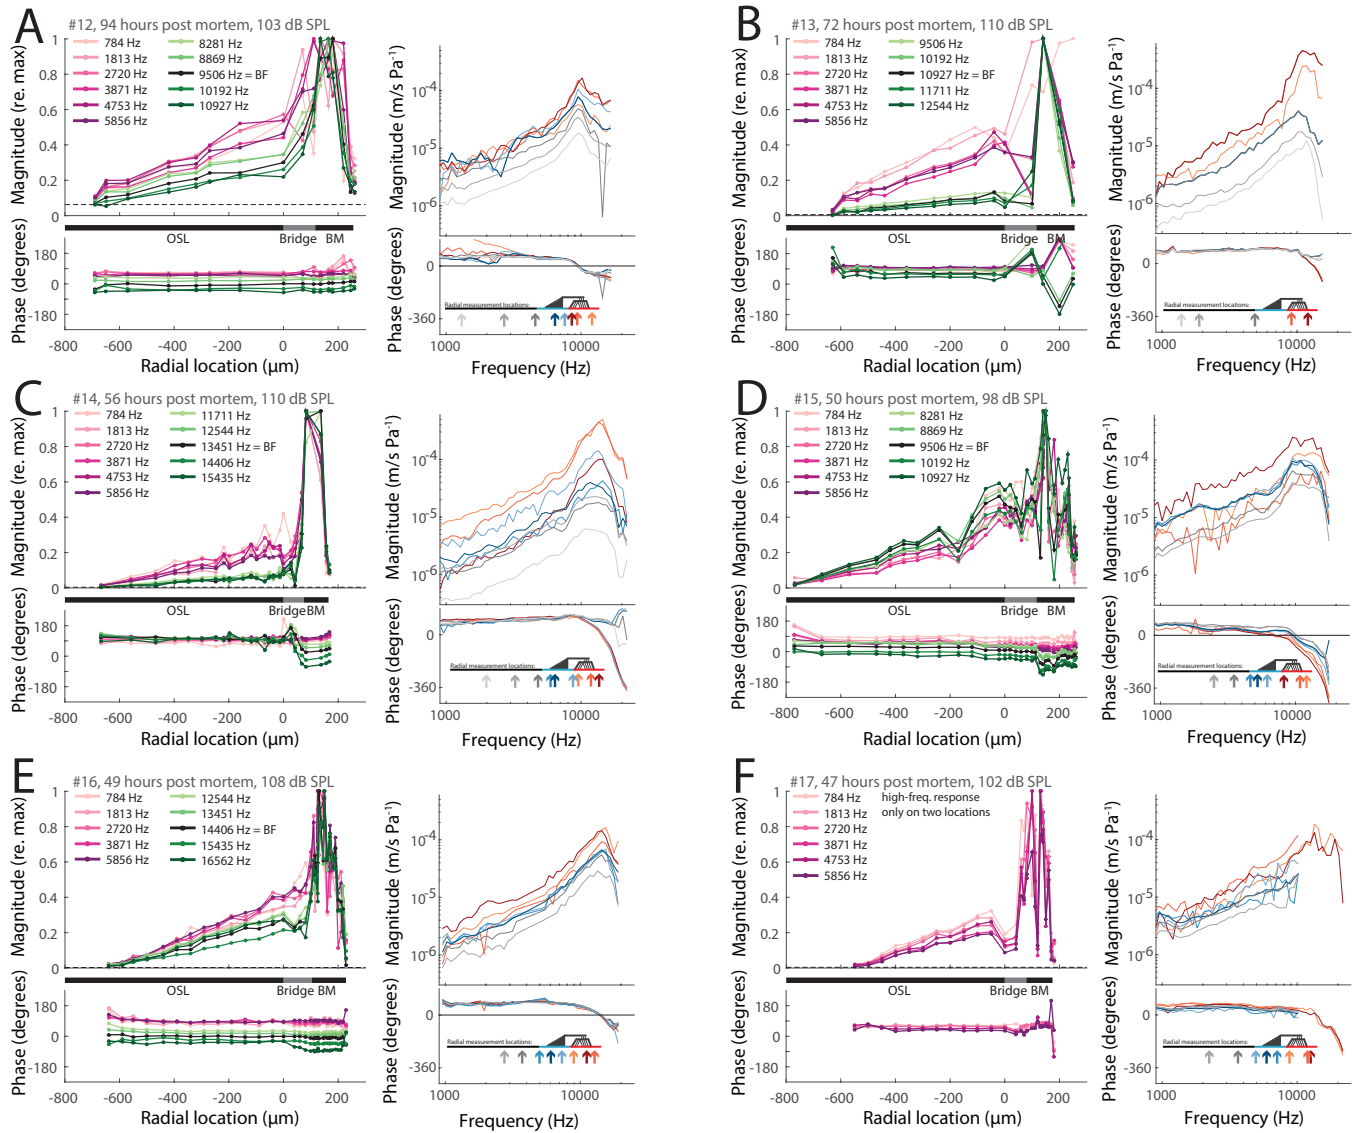

**Fig. S3.** Radial profiles and tuning curves of cochlear partition (CP) transverse motion from six human temporal bones. (A-F) Each panel is similar to Fig. 2 and is from a location  $\sim 1$  mm from the basal end of the cochlea. In panel F, only low-frequency data are shown for velocity versus radial location because high frequency data were only obtained for two BM locations.

## 55 Modeling CP movement

56 In classic cochlear models, CP transverse motion was assumed to be restricted to BM motion, even though there had been  
57 evidence for some OSL transverse motion (see main-text Introduction). In classic models the BM was considered fixed at  
58 both ends. When systematic measurements of BM transverse motion as a function of radial distance across the BM became  
59 available, these provided a basis for modeling BM motion. Guinea-pig BM motion can be accurately modeled with a simple  
60 beam representing the BM as shown in Fig. S4A (10, 11). In contrast, the CP of the human involves motion of multiple  
61 structures, such as the OSL, bridge, and BM, and is not well represented by a simple beam model. Human CP motions, for  
62 below-BF frequencies, can be adequately captured by a composite beam model, as described below.

63 **Methods and Results.** A composite beam model was fit to averaged human CP motion data. The model is based on CP  
64 measurements for below-BF frequencies, where the whole CP moves in phase. Near and above BF, some BM phase measurements  
65 lagged the OSL (Figs. 2, S3) and the beam equations, which apply only to unimodal motion, may not accurately capture the  
66 more complex motion at higher frequencies. The data in Fig. S4B (below-BF data from Fig. 3A) were loess-smoothed (locally  
67 weighted average (12)), yielding the blue line in Fig. S4B. To account for varying widths across temporal bones, we normalized  
68 the  $x$ -coordinates of each cross-sectional motion profile by linear scaling of the measurements in each CP region. Scaling was  
69 performed so that the BM of each temporal bone was 13.3% of the CP width, the CP bridge was 11.5% of the CP width (83%  
70 of the BM) and the OSL was 75.2% of the CP width.

71 We characterized our measurements of CP motion with a mechanical model of the CP that included a composite beam of  
72 two elements: (i) a rigid rod hinged near the modiolus – which emulated the OSL and the medial half of the CP bridge, and  
73 (ii) a flexible beam with constant bending stiffness, simply supported at both ends – which emulated the lateral part of the CP  
74 bridge and the BM. The rigid rod was hinged with a rotational spring at  $x = 0$  (the medial attachment of the OSL) and a  
75 hinge near the mid-point of the bridge, which was assumed to have no torsional stiffness (the second derivative with respect to  
76  $x$  is continuous). We used similar computations as in Homer et al. (11) (Fig. 5d in Section IV and the Appendix in (11) and  
77 adjusted the ratio of the stiffnesses of the two beams ( $\kappa$  in Homer et al.) to best match the averaged data (blue line in Fig.  
78 S4B). Our parameters, defined in Homer et al., are:  $x_t = 0.81$ ;  $x_1 = 0 : 0.01 : x_t$ ;  $x_2 = x_t : 0.01 : 1$ ;  $\kappa = 10^{-4.95}$ ;  $q = 1$ ;  $EI = 1$ .  
79 The resulting composite beam model in Fig. S4B shows the overall properties of our CP motion measurements, including the  
80 OSL moving as a stiff plate hinged at the modiolus, and the maximum CP motion occurring near the BM-bridge connection  
81 (Fig. S4B).

82 **Discussion.** Several features of the model are worthy of comment: First, it may seem surprising that the OSL moved as if  
83 hinged near its connection with the modiolus. This might be because the OSL bone is porous in that region (13–17), which  
84 makes it more flexible and allows a discrete pivot point. Second, a hinge in the middle of the bridge was not expected. A  
85 comparison of the model hinge location to anatomical measurements indicates that the hinge is near the lateral end of the  
86 limbus and the medial edge of the inner sulcus. The medial region of the bridge parallels the tissue of the limbus, whereas the  
87 lateral region of the bridge parallels the inner sulcus and corresponds to an area of low tissue density, and presumably, less  
88 torsional stiffness.

89 Two other modeling studies are relevant. First, Kapuria et al. (18) published a cross-sectional model of the gerbil BM. The  
90 gerbil has a very particular BM anatomy with a flexible BM arcuate zone and a stiff BM pectinate zone. Thus, the gerbil has  
91 both stiff and flexible parts of the CP, just as are present in humans (although at different structures and locations). The  
92 gerbil modeling results suggest that the BF is set mainly by the properties of the more flexible part of the CP (in humans, the  
93 BM) with relatively little influence from the stiff part (in humans, the OSL). If this concept from the gerbil is translated to  
94 our findings, the relatively large volume displacement of the OSL may play only a minor role in setting the BF of the human  
95 cochlea. Second, a cross-sectional model by Taber and Steele (19) included three CP regions, namely the OSL, BM arcuate  
96 zone (stiffened by the arches of Corti), and the BM pectinate zone. This model compared the BM motion with a very stiff OSL  
97 (typical of most mammals) to the BM motion with a flexible OSL (said to be typical of primates) and found that the model  
98 with the flexible OSL produced longer phase delays, as observed in squirrel monkey BM recordings (20). In Kapuria et al.'s and  
99 Taber and Steele's models, even though the volume displacement of the near-rigid OSL (or near-rigid BM region) was large  
100 compared to the flexible BM region, the properties of the near-rigid region had relatively little effect on the traveling wave  
101 other than its phase and did not substantially change the BF.

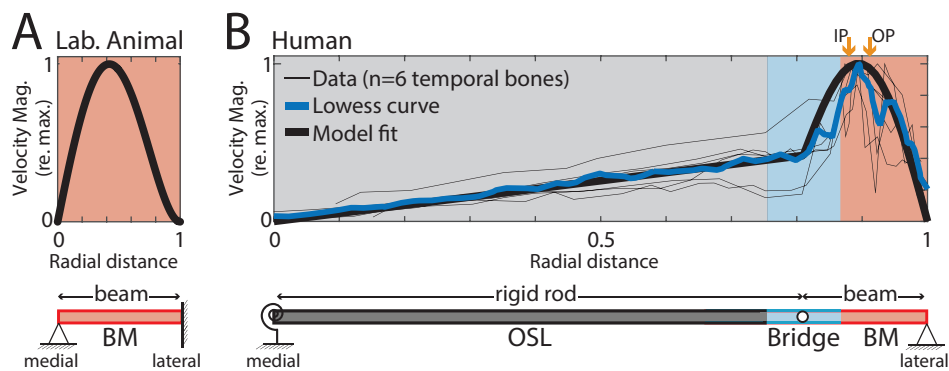

**Fig. S4.** Plots of model fits to cochlear partition (CP) motion in laboratory animals (A) and humans (B), each normalized by its peak value. (A) In a laboratory animal (guinea pig), basilar membrane (BM) motion was approximated by a mechanical beam model in which the BM was simply supported at the osseous spiral lamina (OSL) ( $x = 0$ ) and clamped at the spiral ligament ( $x = 1$ ) (from Homer et al. (11)). (B) In humans, CP motion was fit by a composite beam model consisting of a rigid rod hinged to a flexible beam. The thin black lines plot the average of below BF measurements (as in Fig. 3A) for each human specimen. The blue line is a loess curve (a locally weighted averaging) of the measurements from all six ears. The thick, black line represents the motion of the composite beam model. Orange arrows point to estimated locations of the bottoms of the inner pillar (IP) and outer pillar (OP).



## 102 Methods

103 **Temporal bones.** We used seventeen unidentified fresh human cadaveric temporal bone specimens from the consented donor  
104 program at Massachusetts General Hospital. The first eleven specimens were used to perfect the technique. We report here  
105 results from six ears, 53 to 78 years old (mean = 60.2 years). All were left ears (to keep the measuring set-up consistent) and  
106 four were male. Details regarding the removal and initial preparation of the temporal bones, as well as our criteria to assess  
107 the condition of the bones are described in Nakajima et al. (21) and Frear et al. (22). Immediately after extraction, specimens  
108 were kept in 0.9% saline and refrigerated at 0-4 degrees Celsius. After drilling and preparing a fresh (never frozen) specimen  
109 for measurement, we made reference measurements of stapes velocity, RW membrane velocity, and intracochlear pressures.  
110 Experiments were performed at room temperature, 47 to 108 hours post mortem. Post mortem times are defined as the time  
111 from death to the beginning of CP motion measurements.

112 To prepare for CP motion measurements, we removed the semi-opaque round window (RW) membrane with the sharp edge  
113 of a hypodermic needle to provide an unobstructed view of the cochlear partition. To prevent fluid leakage from the cochlea,  
114 and air entering through the open RW, the temporal bone was oriented with the CP at the RW region in a horizontal plane  
115 facing upward. The fluid level was controlled with absorbent tips (#503, Henry Schein) so that over the CP there was only a  
116 thin fluid film to avoid possible measurement artifact due to motion of the fluid-air boundary that differed from the motion of  
117 the CP (23). The removal of fluid in scala tympani reduced the mass seen by the CP. However, at low frequencies where the  
118 effect of mass is negligible, CP motion would not be affected by this reduction in mass. At high frequencies (>5-10 kHz) the  
119 fluid loading may change the response of the CP.

120 **Sound stimulation.** Acoustic pure tones between 100 Hz and 24 kHz (10 per octave) were generated by a Radio Shack driver  
121 (400-1377) and delivered to the ear canal with a flexible polyethylene tube. The sound pressure level in the ear canal 1 mm  
122 from the tympanic membrane was monitored with a calibrated probe-tube microphone (Knowles EK-23103-000, calibrated  
123 against a Larsen Davis 2541), which was fed through a metal sleeve that penetrated the bony ear canal. Sound pressure level  
124 was kept constant as a function of frequency in each bone (iso-input), but was varied across experiments (from 94-110 dB SPL)  
125 to produce adequate signal strengths for the laser Doppler vibrometer.

126 **Laser Doppler velocity measurements.** A laser Doppler vibrometer (LDV) (Polytec CLV 700) was used to measure the velocities  
127 of the posterior crus or footplate of the stapes, the center of the RW membrane, and along the scala tympani surface of the CP.  
128 Reflective polystyrene microbeads (50  $\mu\text{m}$  diameter,  $\sim 0.07 \mu\text{g}$  each) were used to enhance the signal-to-noise ratio for stapes  
129 and RW measurements. For CP measurements, the laser beam was oriented perpendicular to and focused on the scala-tympani  
130 surface of the CP. This provided adequate reflections without microbeads (e.g. as in (24)). The radial position of the CP  
131 measurement point was controlled with a micromanipulator. We measured up to 34 radial locations on the CP using 5  $\mu\text{m}$   
132 radial-position steps on the BM and bridge, and 50  $\mu\text{m}$  steps on the OSL, skipping points where the reflectivity was too  
133 low. Thus, we depended on CP reflectivity, resulting in varied measurement locations across specimens. In our system the  
134 laser-beam spot size on the tissue can be as large as 37  $\mu\text{m}$  (as indicated by Polytec specifications), but the actual spot size  
135 was visually smaller, and 5  $\mu\text{m}$  movements often produced large changes in reflectivity. Thus, we think that the spot size did  
136 not produce substantial spatial smoothing in our data. The depth of field of the laser Doppler measurements (according to  
137 Polytec specification) is theoretically 2 mm, however, in this passive preparation the deeper structures are expected to vibrate  
138 the same as the surface CP. In several early experiments, we measured the motion of reflective microbeads (5-20  $\mu\text{m}$  diameter)  
139 on the CP surface, washed them away, measured at the same spot and found similar velocities, i.e. motions within 2 dB and  
140 phases within 15 degrees, with similar CP velocity measurements with and without beads.

141 In five temporal bones we obtained data up to one-half octave above the BF. In one temporal bone, low laser signals  
142 prevented obtaining reliable near-BF data. For temporal bone #16 (used for Fig. 2), we excluded the CP motion at  $f=4700$   
143 Hz because an anti-resonance in stapes velocity decreased the sound pressure in scala vestibuli by 40 dB. In one temporal bone  
144 (#15), during removal of the RW membrane, the OSL was punctured 1 mm apical to the measurement location. This caused  
145 stapes velocity and intracochlear sound pressure to change in a small frequency band centered around 2 kHz by less than 5 dB,  
146 but the measurements were unchanged for frequencies below 1.5 kHz and above 3 kHz, thus these data were used in Fig. 3 and  
147 S4. To determine possible vibrational coupling of the ear-canal sound to the temporal bone, we measured the velocity of the  
148 cochlear promontory during acoustic stimulation; all CP motion presented was  $\sim 10-20$  dB larger than cochlear promontory  
149 motion.

150 **Intracochlear pressure measurements.** Fiber-optic pressure sensors developed by Olson (25) were used to record sound pressure  
151 in the vestibule (21, 26). Details regarding the calibration and placement of a sensor in the vestibule are given elsewhere  
152 (21, 22, 27). Initial intracochlear pressure was measured with the RW membrane intact and then again after the RW was  
153 removed. Removing the RW caused minimal changes (<3 dB) in intracochlear pressures for all tested frequencies.

154 **Anatomical measurements.** During an experiment, when the human CP is viewed through an operating microscope, the bony  
155 OSL looks white and bright, while the soft-tissue bridge and BM regions look dark. In our initial motion measurements, we  
156 presumed that the whole dark region was the BM, and only after we compared the width of this region directly to histological  
157 anatomy, did we realize that the dark region included both the bridge and BM. Because of this, during motion measurements,  
158 the anatomical boundaries of the OSL, CP bridge and BM were based on (i) the lateral edge of the bony OSL (clearly visible  
159 under the microscope used during the experiment), (ii) the edge of the spiral ligament (also visible under the microscope, and

160 experimentally defined as the most lateral CP place where the velocity was close to the noise floor), and (iii) the width-ratio  
161 of the BM and CP bridge (bridge width/BM width =  $0.83 \pm 0.12$  standard deviation, in the cochlear base as measured in  
162 histology).

163 In six histologically-prepared temporal bones stained with Hematoxylin and Eosin from the Otopathology Laboratory at  
164 our institution, we estimated the bridge/BM width ratios in the base. In additional 15 specimens we confirmed the presence  
165 of the bridge throughout the whole cochlear length. BM width was defined as the width between the basilar crest and the  
166 inner-sulcus cell that is adjacent to the bottom of the inner hair cells and close to the habenula perforata (28, 29). Bridge width  
167 was the width between the lateral edge of the bony OSL and the BM. These widths were measured from 20  $\mu\text{m}$ , mid-modiolar  
168 sectioned slides cut in the vertical plane (2). The locations examined were  $\sim 6$  mm from the cochlear base and thus 4–5 mm  
169 apical from our motion-measurement location. Sections that are perpendicular to the CP at the motion-measurement location  
170 in the cochlear hook require an unusual cutting plane and were not available. However, since there was little difference in the  
171 bridge-width/BM-width ratio at other cochlear locations throughout the mid-modiolar sections, we expect that there are no  
172 substantial differences in this ratio from the basal anatomical measurement location to the motion-measurement location. The  
173 image in Figs. 1B and S1A was chosen as a representative example from the six human temporal bones that we analyzed. The  
174 images in Figs. 1A, S1, and S2 were from the basal and apical turns of a guinea pig, mouse, gerbil, cat, and chinchilla cochleas,  
175 also from the Otopathology Laboratory collection. Cochleas of at least three different animals from each species were studied  
176 and a representative section was chosen for the image of each species.

177 **Calculating Q values.** We quantified tuning sharpness by the quality factor,  $Q_{10} = f/\Delta f$ , where  $f$ =BF and  $\Delta f$  is the bandwidth  
178 between the frequencies at which the response decreased by 10 dB from the maximum. For our human data, the sparse  
179 frequency sampling of 10 points per octave affected the accuracy of measuring both BF and bandwidth. Thus the  $Q_{10}$  values are  
180 accurate only within  $\sim 15\%$ , based on  $Q_{10}$  values of frequencies neighboring the BF and their bandwidths. We calculated  $Q_{10}$   
181 values for animal experiments from data extracted from published post mortem (or high-level) tuning curves using “DataThief”  
182 software (<https://datathief.org/>).

## 183 References

- 184 1. Raufer S, Cho NH, Guinan JJJ, Puria S, Nakajima HH (2019) The Anatomy and Cochlear Partition Motion-Pattern  
185 of the Human is Different from those of Laboratory Animals: Optical Coherence Tomography (OCT) Measurements.  
186 *Conference Poster, 42nd Annual MidWinter Meeting of the Association for Research in Otolaryngology.*
- 187 2. Merchant SN, Nadol J (2010) *Schuknecht's Pathology of the Ear* eds. Merchant SN, Nadol J. (PMPH, USA), 3 edition.
- 188 3. Fernández C (1952) Dimensions of the Cochlea (Guinea Pig). *The Journal of the Acoustical Society of America* 24(5):519–  
189 523.
- 190 4. Ehret G, Frankenreiter M (1977) Quantitative Analysis of Cochlear Structures in the House Mouse in Relation to  
191 Mechanisms of Acoustical Information Processing. *Journal of Comparative Physiology* 122:65–85.
- 192 5. Plassmann W, Peetz W, Schmidt M (1987) The Cochlea in Gerbilline Rodents. *Brain, Behavior and Evolution* 30:82–101.
- 193 6. Cabezudo LM (1978) The Ultrastructure of the Basilar Membrane in the Cat. *Acta Oto-Laryngologica* 86:160–175.
- 194 7. Bohne BA, Carr CD (1979) Location of structurally similar areas in chinchilla cochleas of different lengths. *The Journal*  
195 *of Acoustical Society of America* 66:411–414.
- 196 8. Greenwood DD (1990) A cochlear frequency-position function for several species—29 years later. *Journal of the Acoustical*  
197 *Society of America* 87(6):2592–2605.
- 198 9. Warren RL, et al. (2016) Minimal basilar membrane motion in low-frequency hearing. *Proceedings of the National Academy*  
199 *of Sciences* 113(30):E4304–E4310.
- 200 10. Cooper NP (2000) Radial variation in the vibrations of the cochlear partition in *Recent Developments In Auditory*  
201 *Mechanics*, eds. Wada H, Takasaka T, Ikeda K, Ohyama K. (World Scientific), pp. 109–115.
- 202 11. Homer M, Champneys A, Hunt G, Cooper N (2004) Mathematical modeling of the radial profile of basilar membrane  
203 vibrations in the inner ear. *The Journal of the Acoustical Society of America* 116(2):1025–1034.
- 204 12. Cleveland WS (1993) *Visualizing Data*. (Hobart Press), 1 edition.
- 205 13. Corti (1854) Recherches sur l'organe de l'ouïe des mammiferes. *Zeitschrift fuer wissenschaftliche Zoologie* 3(4).
- 206 14. Neubert K (1950) Die Basilar membran des Menschen und ihr Verankerungssystem. *Zeitschrift für Anatomie und*  
207 *Entwicklungsgeschichte* 114:540–590.
- 208 15. Fleischer G (1973) Studien am Skelett des Gehörhörgans der Säugetriere einschließlich des Menschen. *Säugetrierekundliche*  
209 *Mitteilungen* 2(3):131–239.
- 210 16. Küçük B, et al. (1991) Microstructures of the Bony Modiolus in the Human Cochlea : A Scanning Electron Microscopic  
211 Study. *Journal of Electron Microsc* 40(4):193–197.
- 212 17. Shepherd RK, Colreavy MP (2004) Surface Microstructure of the Perilymphatic Space. 130(May 2004):518–523.
- 213 18. Kapuria S, Steele CR, Puria S (2017) Unraveling the mystery of hearing in gerbil and other rodents with an arch-beam  
214 model of the basilar membrane. *Scientific Reports* 7:228.
- 215 19. Taber A, Steele CR (1981) Cochlear model including three-dimensional fluid and four modes of partition flexibility.  
216 *Journal of the Acoustical Society of America* 70(2):426–436.
- 217 20. Rhode S (1971) Observations of the Vibration of the Basilar Membrane in Squirrel Monkeys using the Mossbauer Technique.  
218 *Journal of the Acoustical Society of America* 49(4):1281–1231.

- 219 21. Nakajima HH, et al. (2009) Differential Intracochlear Sound Pressure Measurements in Normal Human Temporal Bones.  
220 *Journal of the Association for Research in Otolaryngology* 10(1):23–36.
- 221 22. Frear D, Guan X, Stieger C, Rosowski JJ, Nakajima HH (2018) Impedances of the inner and middle ear estimated from  
222 intracochlear sound pressures in normal human temporal bones. *Hearing Research* 367:17–31.
- 223 23. Cooper NP, Rhode WS (1992) Basilar membrane mechanics in the hook region of cat and guinea-pig cochleae: Sharp  
224 tuning and nonlinearity in the absence of baseline position shifts. *Hearing Research* 63(1-2):163–190.
- 225 24. Dong W, Olson ES (2009) In vivo impedance of the gerbil cochlear partition at auditory frequencies. *Biophysical Journal*  
226 97(5):1233–1243.
- 227 25. Olson ES (1999) Direct measurement of intra-cochlear pressure waves. *Nature* 402(6761):526–529.
- 228 26. Olson ES (2001) Intracochlear pressure measurements related to cochlear tuning. *Journal of the Acoustical Society of*  
229 *America* 110:349–367.
- 230 27. Stieger C, Rosowski JJ, Nakajima HH (2013) Comparison of forward (ear-canal) and reverse (round-window) sound  
231 stimulation of the cochlea. *Hearing Research* 301:105–114.
- 232 28. Bhatt KA, Liberman MC, Nadol J (2001) Morphometric Analysis of Age-Related Changes in the human basilar membrane.  
233 *Ann Otol Rhinol Laryngol* 110:1147–1153.
- 234 29. Liu W, et al. (2015) Macromolecular organization and fine structure of the human basilar membrane - RELEVANCE for  
235 cochlear implantation. *Cell and tissue research* 360:245–262.
